# Supplementary material
Source: PubMed Central journal article supplement (PMC2527954)
Supplement: 0803174105_0803174105SI.pdf [file 0803174105_0803174105SI.pdf]

# Supporting Information

Fernández *et al.* 10.1073/pnas.0803174105

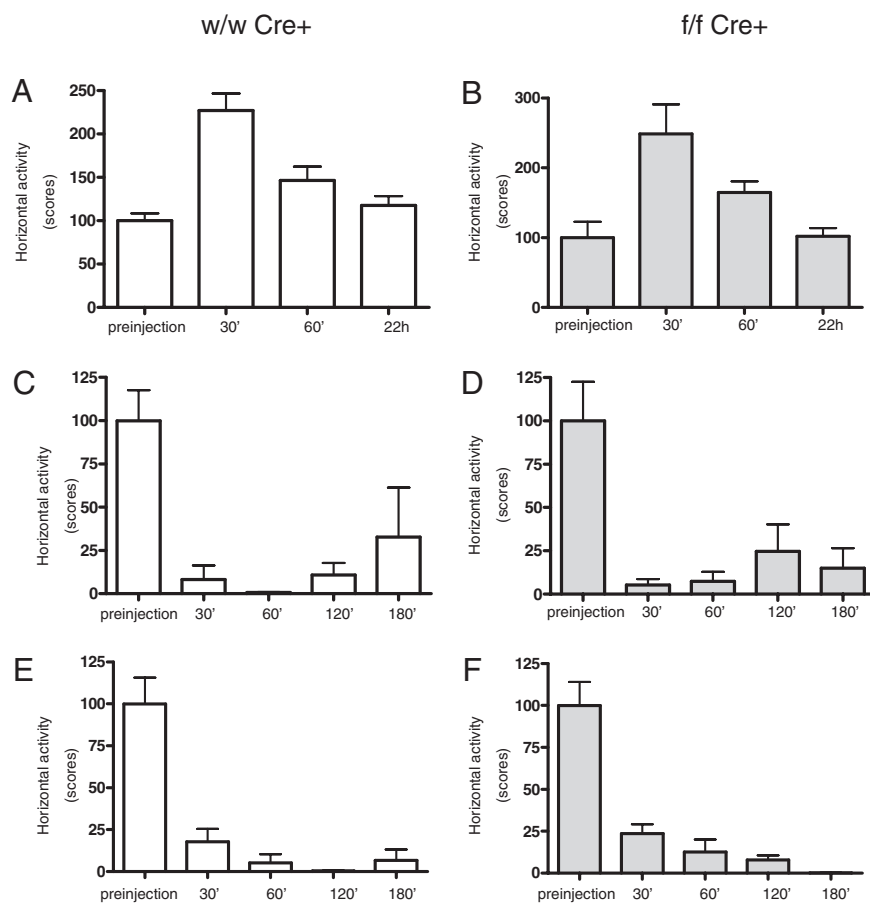

**Fig. S1.** Wild-type (A, C, and E) and mutant (B, D, and F) 4-month-old male mice were injected i.p. with methylphenidate (A and B), haloperidol (C and D), or diazepam (E and F), and their movements were recorded at different times in the activity cage. All values are expressed as a percentage of the untreated controls (100%) for comparison purposes. Error bars represent the mean  $\pm$  standard deviation of 10 mice. The whole experiment was repeated 3 times, and representative examples are presented here.

**Table S1. Primers used for genotyping and gene expression quantification**

|                                                  |                            |
|--------------------------------------------------|----------------------------|
| Primers to check elimination of the neo cassette |                            |
| Neo sense                                        | ATC TGGGAAAAA GCAAAC CA    |
| Neo antisense                                    | CAT CCA CATGGA CACCAGAG    |
| Primers used for genotyping                      |                            |
| AMD sense                                        | AAGGGA AGT CCT GCTCCA GT   |
| AMD antisense                                    | CTG ATAAAGGGG TGCGTT GT    |
| CRE sense                                        | TGA GTT TGGACA AACCACAAC   |
| CRE antisense                                    | GGC ATC CGC TTA CAGACAAG   |
| Primers used for real-time RT-PCR                |                            |
| AM sense                                         | GCCACAGAA TGAAGCTGG TT     |
| AM antisense                                     | TTAGCG CCC ACT TATTCCAC    |
| CRLR sense                                       | CCA TTCAACAAG CAGAAGGCCT   |
| CRLR antisense                                   | GCCGAA ACC AGT GTCCAT CTT  |
| RAMP2 sense                                      | TTG ATTAGCAGG CATTAC AGCG  |
| RAMP2 antisense                                  | GGTGAG CCTCAAGGATGA TGTT   |
| RAMP3 sense                                      | CAA CCT GTCGGA GTTCAT CGTG |
| RAMP3 antisense                                  | AAC TGC CTG TGG ATTCCAGTGA |
| AM2 sense                                        | GCTAGCAGA TCCCAGCTT TG     |
| AM2 antisense                                    | GCA GGTAGAGGA GGCTGA TG    |
| $\alpha$ CGRP sense                              | CTCCAG GCA GTG CCTTTGA     |
| $\alpha$ CGRP antisense                          | CAG GTG GCA GTG TTGCAGG    |
| 18S sense                                        | ATG CTC TTA GCTGAGTGT CCCG |
| 18S antisense                                    | ATT CCTAGC TGC GGTATCCAGG  |

---
